# Supplementary material for: Determination of biogenic amines in alcoholic beverages using a novel fluorogenic compound as derivatizing reagent
Source: Royal Society of Chemistry journal article supplement (doi:10.1039/d1ra01436f), 2021-01-01
Supplement: d1ra01436f1.pdf [file d1ra01436f1.pdf]

## Determination of biogenic amines in alcoholic beverages using a novel fluorogenic compound as derivatizing reagent

Fangfang Zhu,<sup>#a</sup> Honglong Liu,<sup>#a</sup> Wenqing Zhang,<sup>a</sup> Chuanyuan Du,<sup>a</sup> Hao Zhu,<sup>a</sup> Xiaodi Du,<sup>a</sup> Xiaosong Hu,<sup>\*a</sup> and Yawei Lin<sup>\*a</sup>

---

<sup>a</sup> Department of Chemistry, School of Chemistry, Chemical Engineering and Life Sciences, Wuhan University of Technology, 430070 Wuhan, China

<sup>#</sup> These authors contributed equally.

<sup>\*</sup> Email: [xhu@whut.edu.cn](mailto:xhu@whut.edu.cn) (X. Hu), [linyawei2012@whut.edu.cn](mailto:linyawei2012@whut.edu.cn) (Y. Lin)

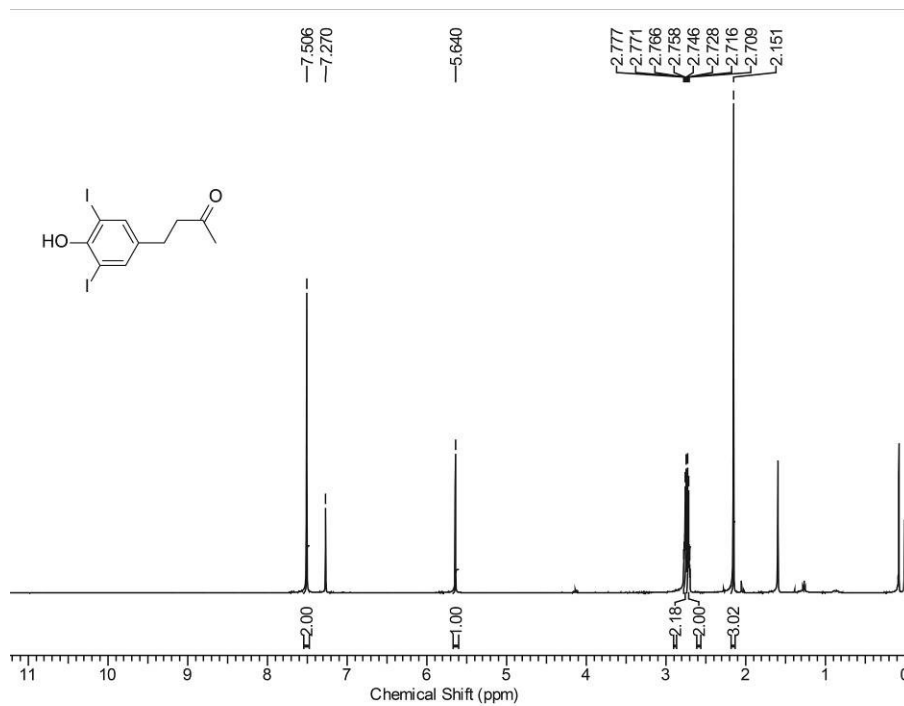

Fig. S1 <sup>1</sup>H NMR of compound 1 (500 MHz, CDCl<sub>3</sub>).

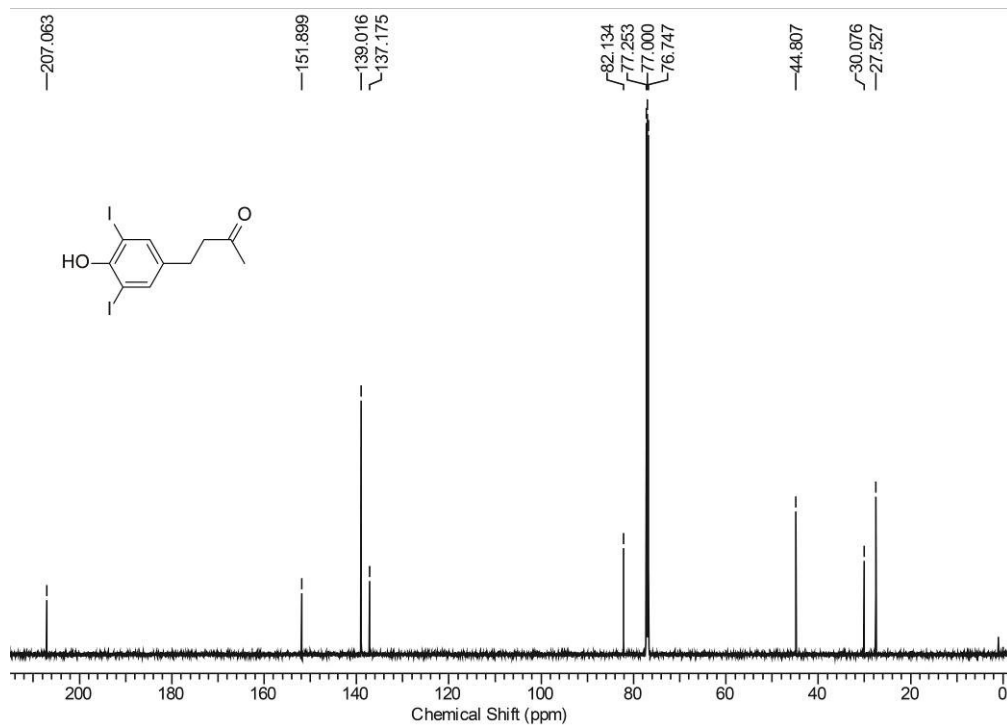

Fig. S2 <sup>13</sup>C NMR of compound 1 (126 MHz, CDCl<sub>3</sub>).

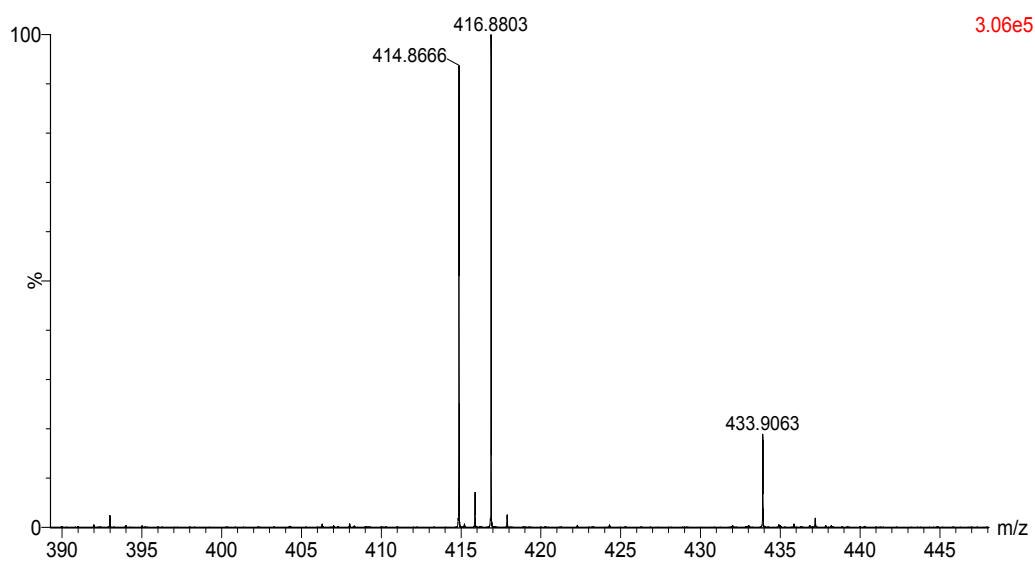

**Fig. S3** compound **1** high resolution mass spectrometry. Calculated:  $m/z = 416.8843$ , found:  $m/z = 416.8803$ ,  $[M+H]^+$ .

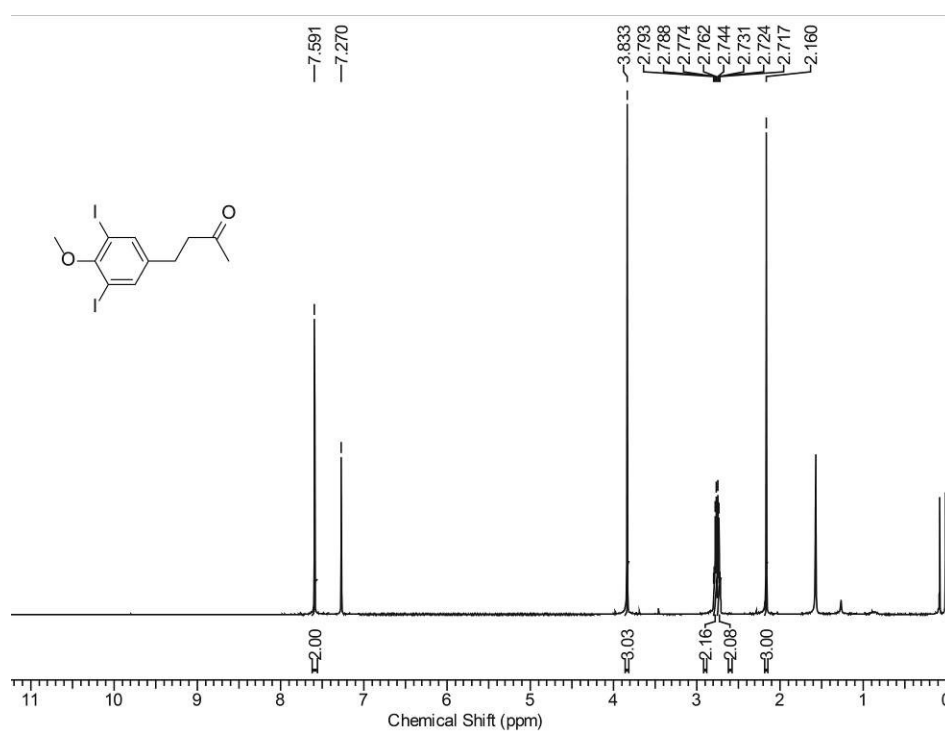

**Fig. S4**  $^1H$  NMR of compound **2** (500 MHz,  $CDCl_3$ ).

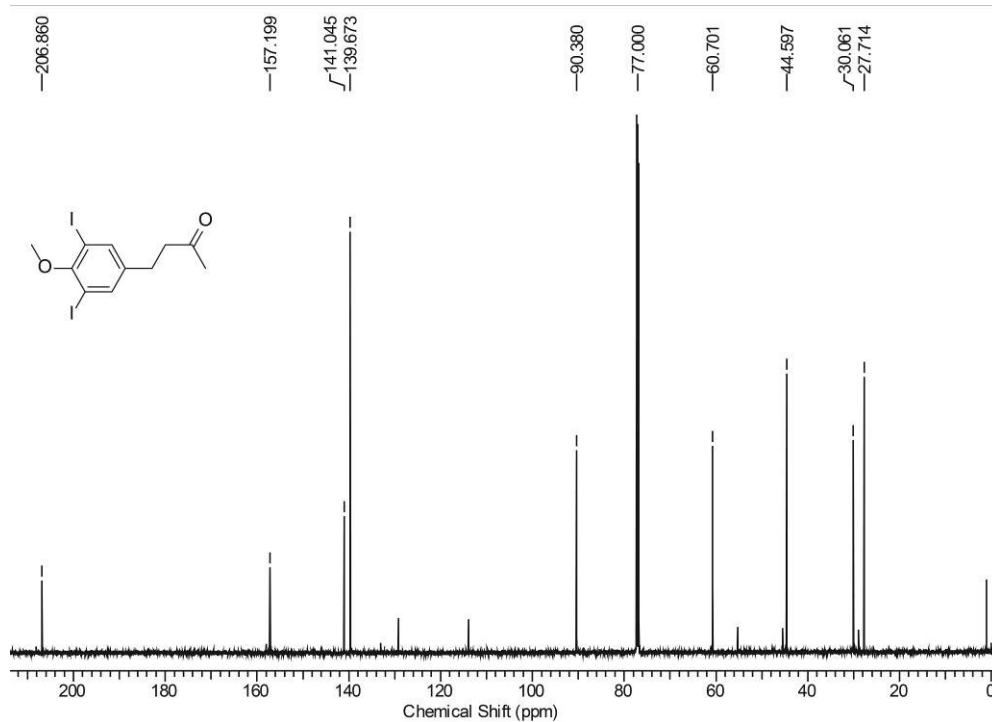

Fig. S5  $^{13}\text{C}$  NMR of compound **2** (126 MHz,  $\text{CDCl}_3$ ).

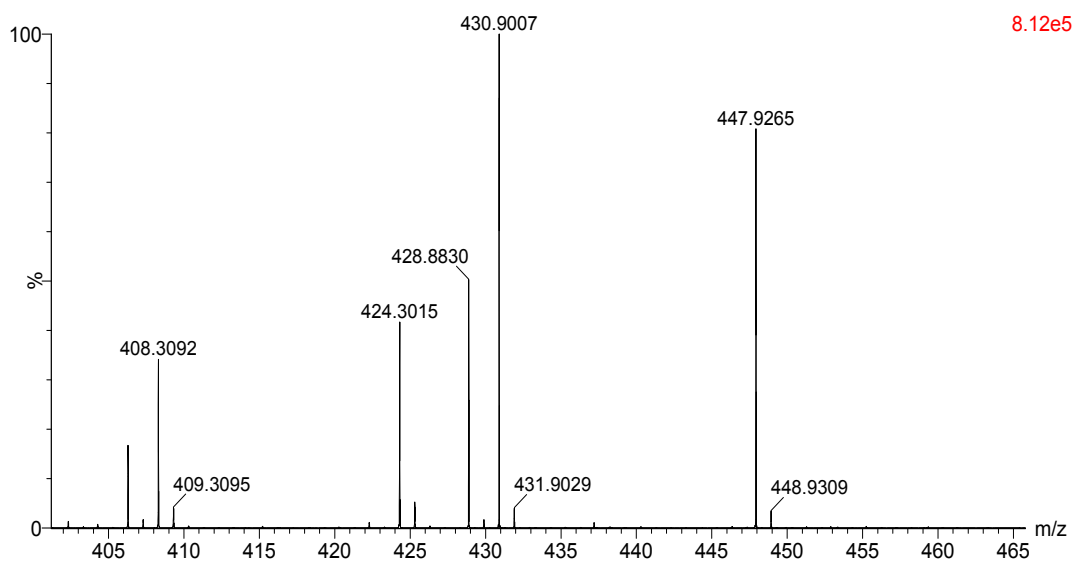

Fig. S6 compound **2** high resolution mass spectrometry. Calculated:  $m/z = 430.8999$ , found:  $m/z = 430.9007$ ,  $[\text{M}+\text{H}]^+$ .

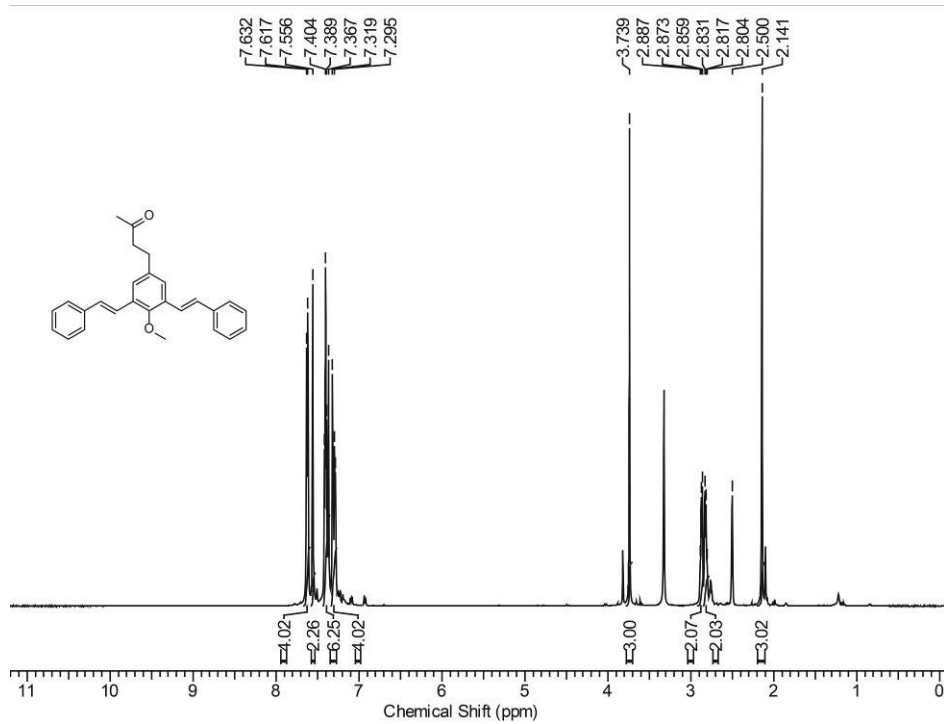

Fig. S7  $^1\text{H}$  NMR of compound 3 (500 MHz, DMSO- $d_6$ ).

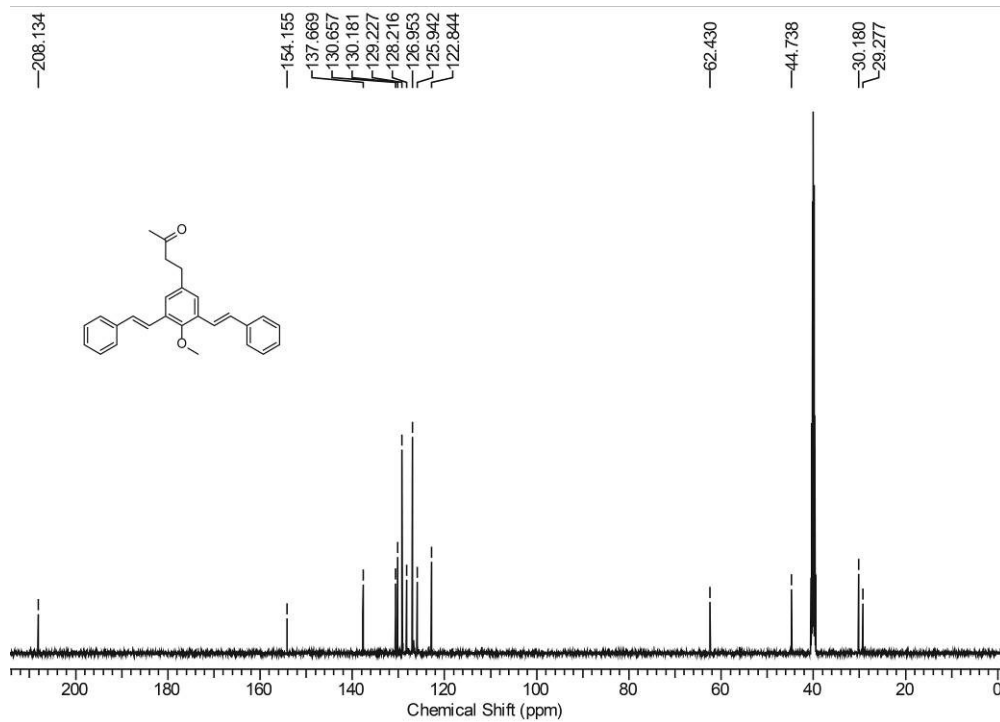

Fig. S8  $^{13}\text{C}$  NMR of compound 3 (126 MHz, DMSO- $d_6$ ).

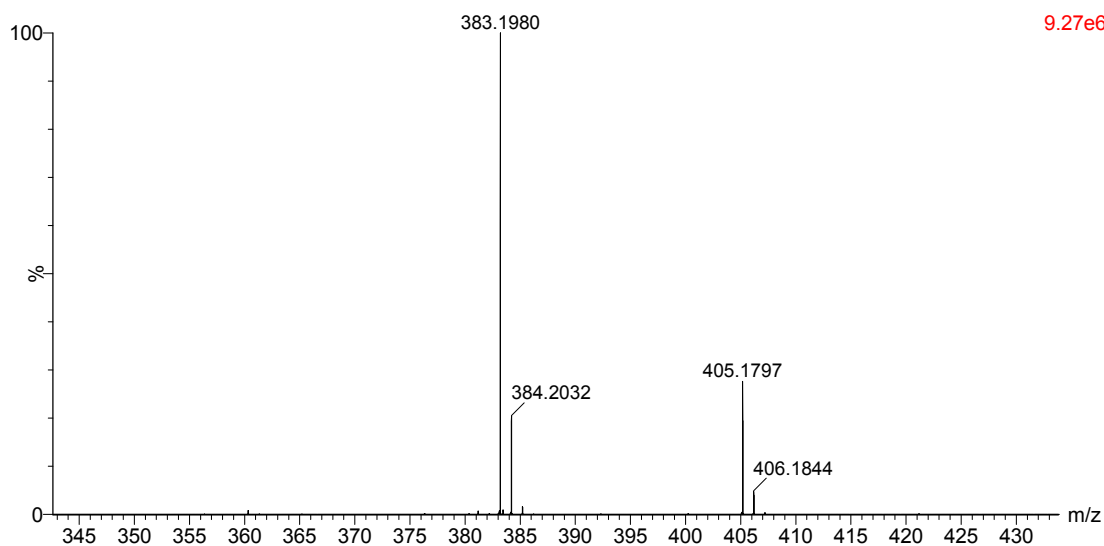

**Fig. S9** compound **3** high resolution mass spectrometry. Calculated:  $m/z = 383.2006$ , found:  $m/z = 383.2032$ ,  $[M+H]^+$ .

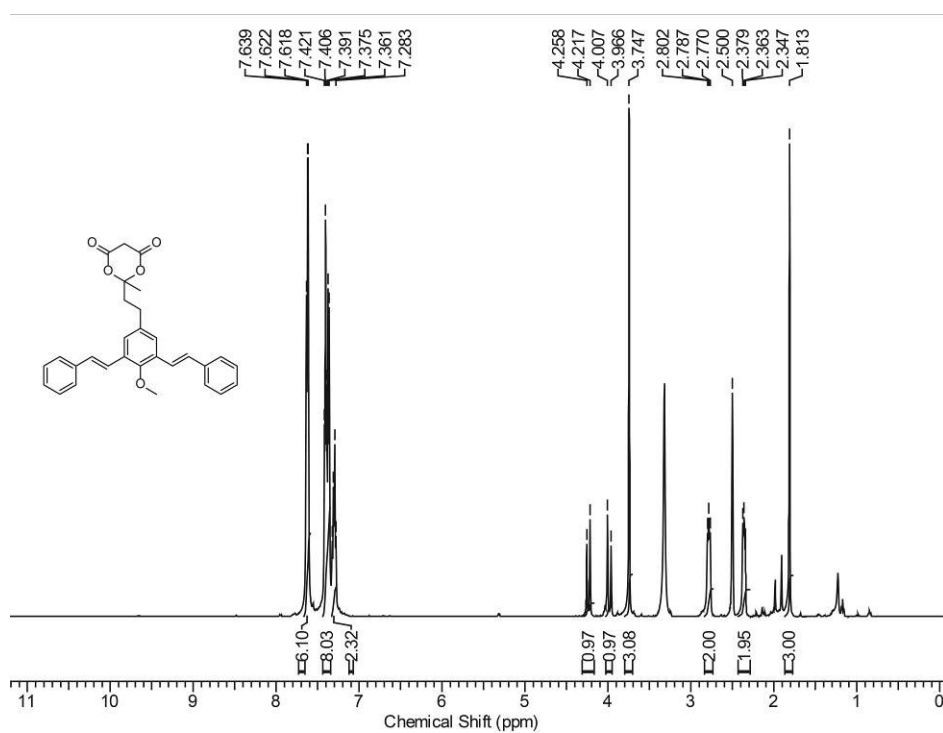

**Fig. S10**  $^1\text{H}$  NMR of compound **4** (500 MHz,  $\text{DMSO-}d_6$ ).

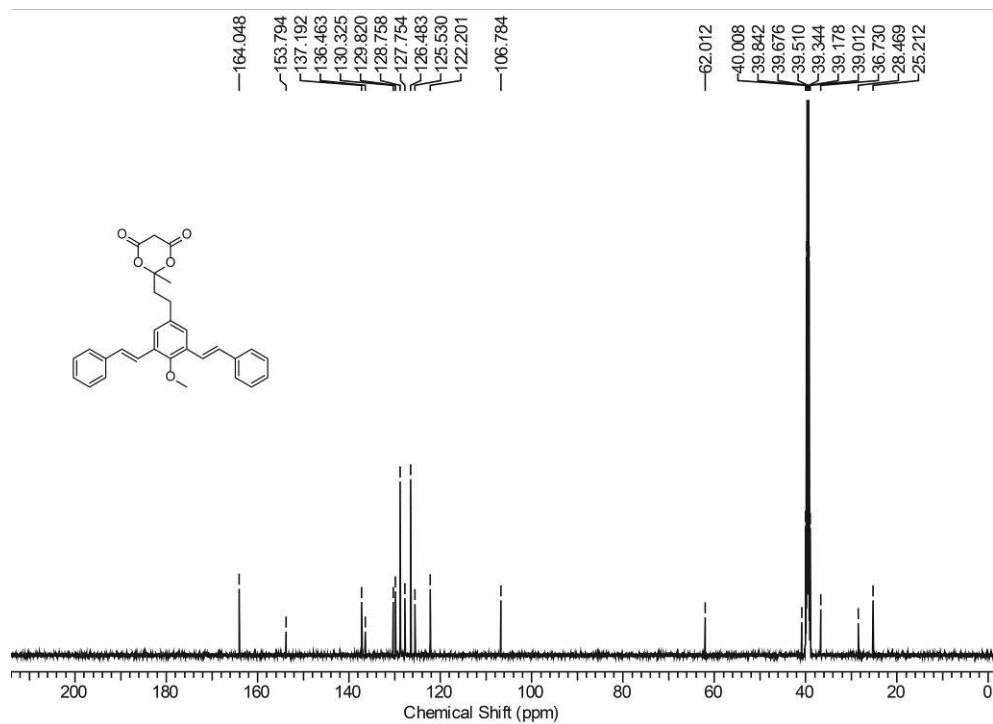

**Fig. S11**  $^{13}\text{C}$  NMR of compound **4** (126 MHz, DMSO- $d_6$ ).

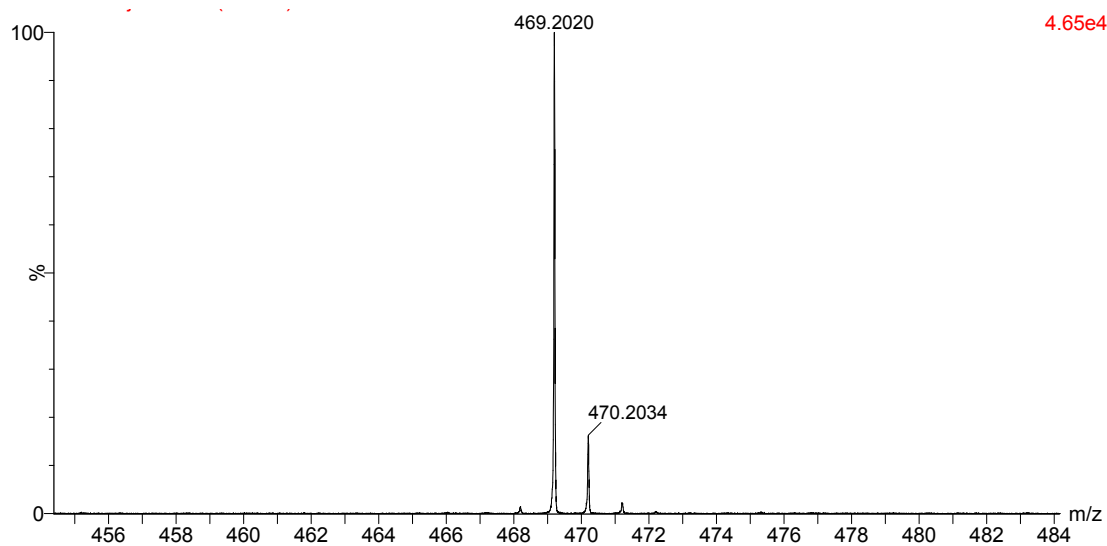

**Fig. S12** compound **4** high resolution mass spectrometry. Calculated:  $m/z$  = 469.2010, found:  $m/z$  = 469.2020,  $[\text{M}+\text{H}]^+$ .

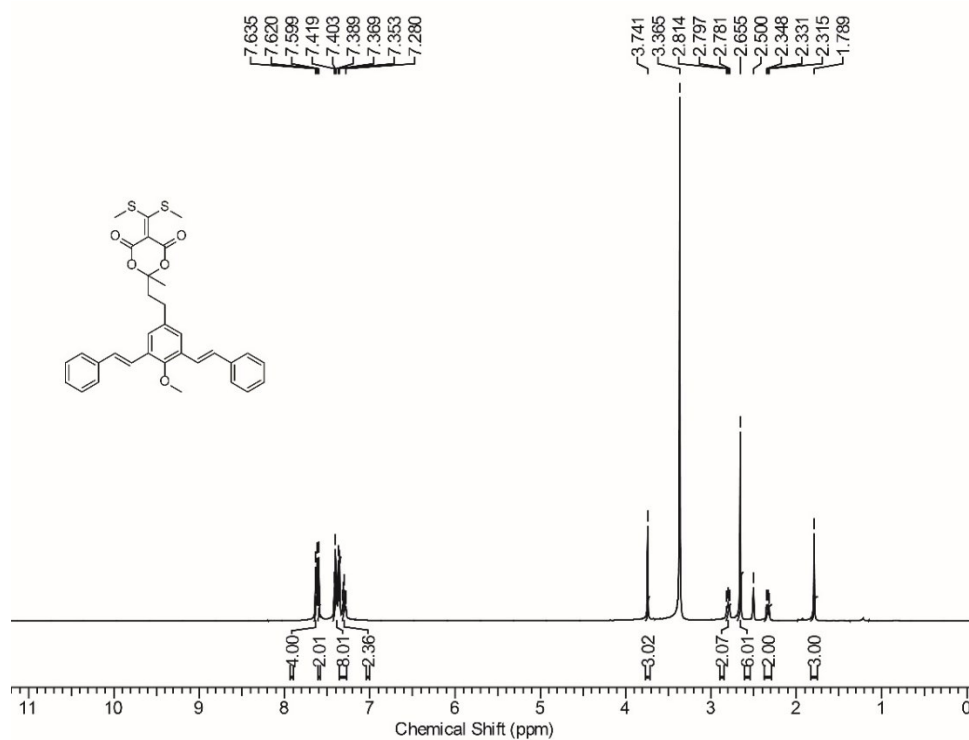

Fig. S13 <sup>1</sup>H NMR of BSMAD (500MHz, DMSO-*d*<sub>6</sub>).

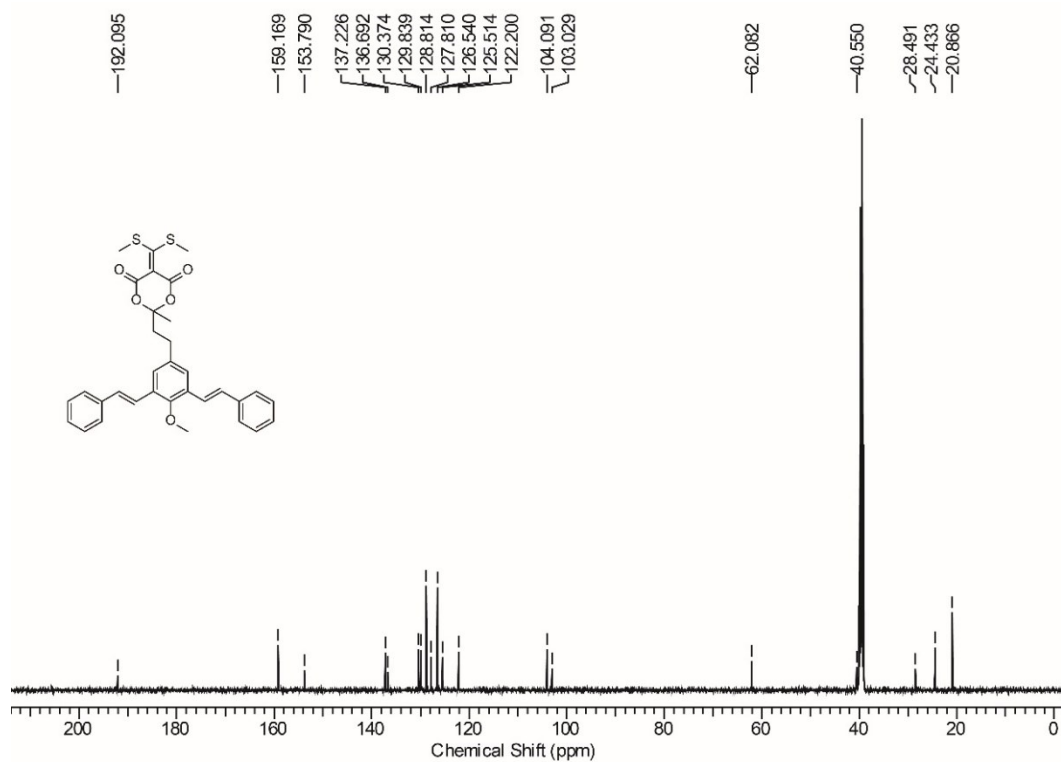

Fig. S14 <sup>13</sup>C NMR of BSMAD (126MHz, DMSO-*d*<sub>6</sub>).



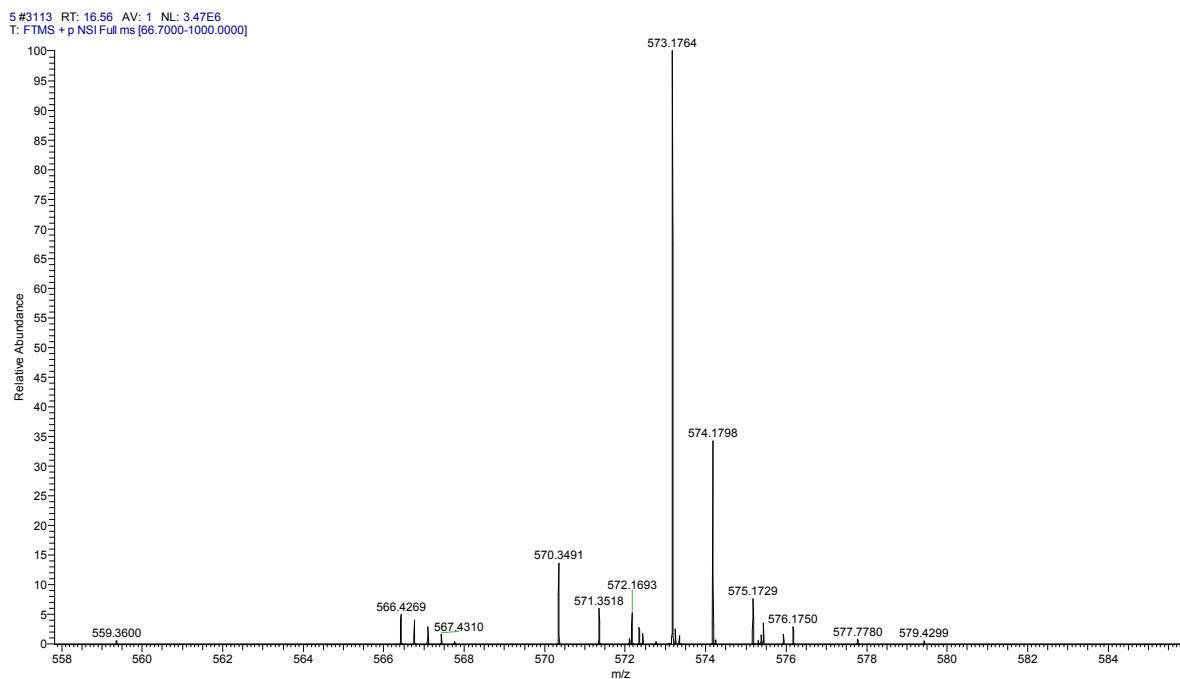

**Fig. S15** BSMAD high resolution mass spectrometry. Calculated:  $m/z = 573.1764$ , found:  $m/z = 573.1764$ ,  $[M+H]^+$ .

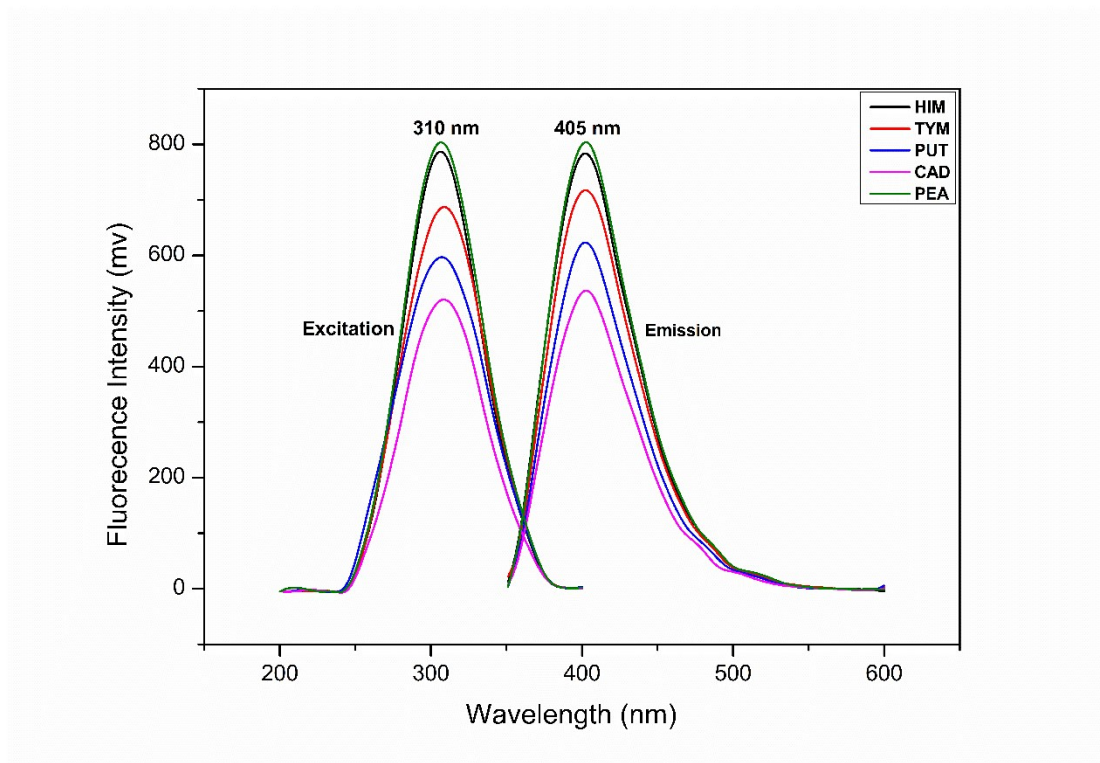

**Fig. S16** fluorescence excitation and emission spectra of derivative products (HIM-BSMAD, TYM-BSMAD, PUT-BSMAD, CAD-BSMAD, PEA-BSMAD),  $\lambda_{ex} = 310\text{nm}$ ,  $\lambda_{Em} = 405\text{nm}$ .

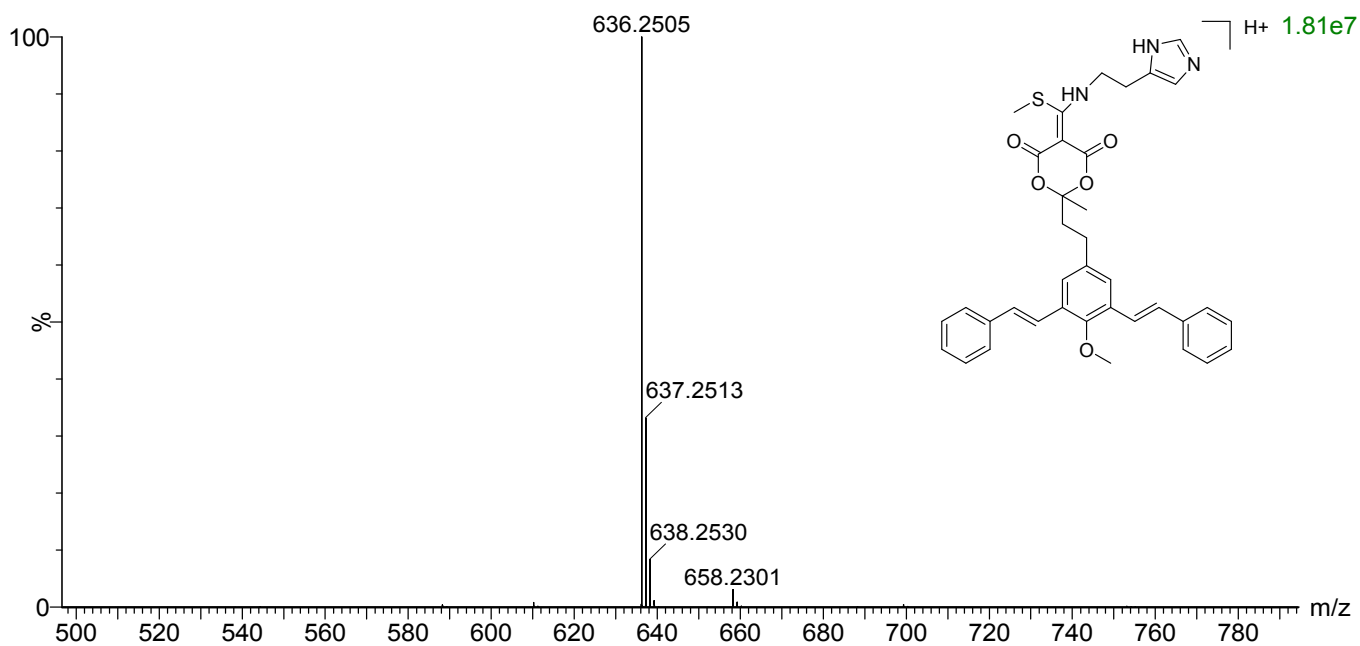

**Fig. S17 HIM-BSMAD** high resolution mass spectrometry Calculated:  $m/z = 636.2527$ , found:  $m/z = 636.2505$ ,  $[M+H]^+$ .

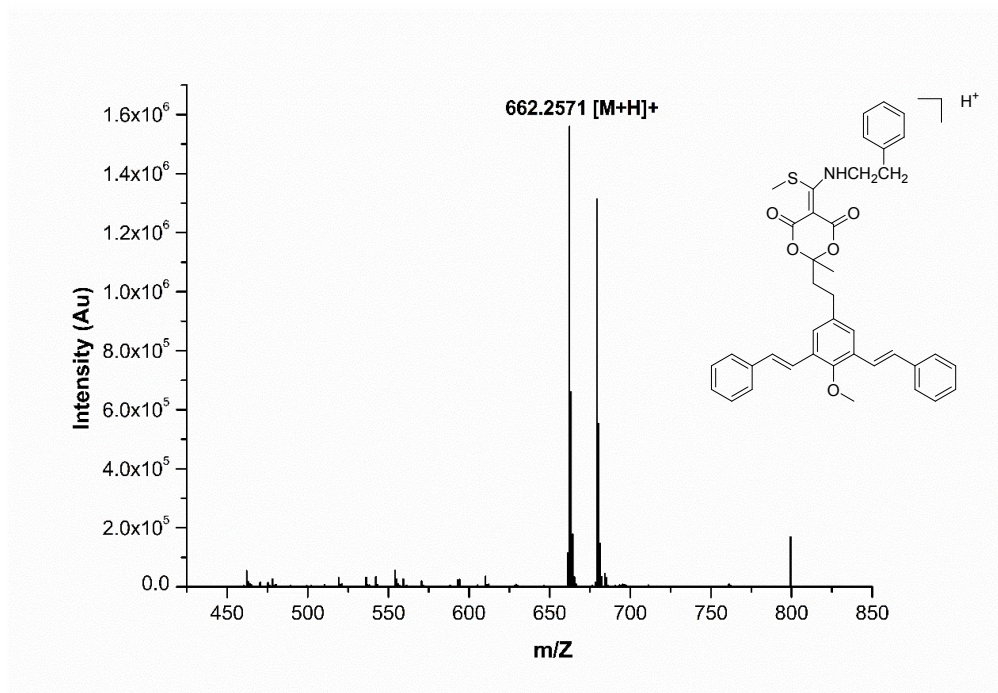

**Fig. S18 TYM-BSMAD** high resolution mass spectrometry. Calculated:  $m/z = 662.2571$ , found:  $m/z = 662.2571$ ,  $[M+H]^+$ .

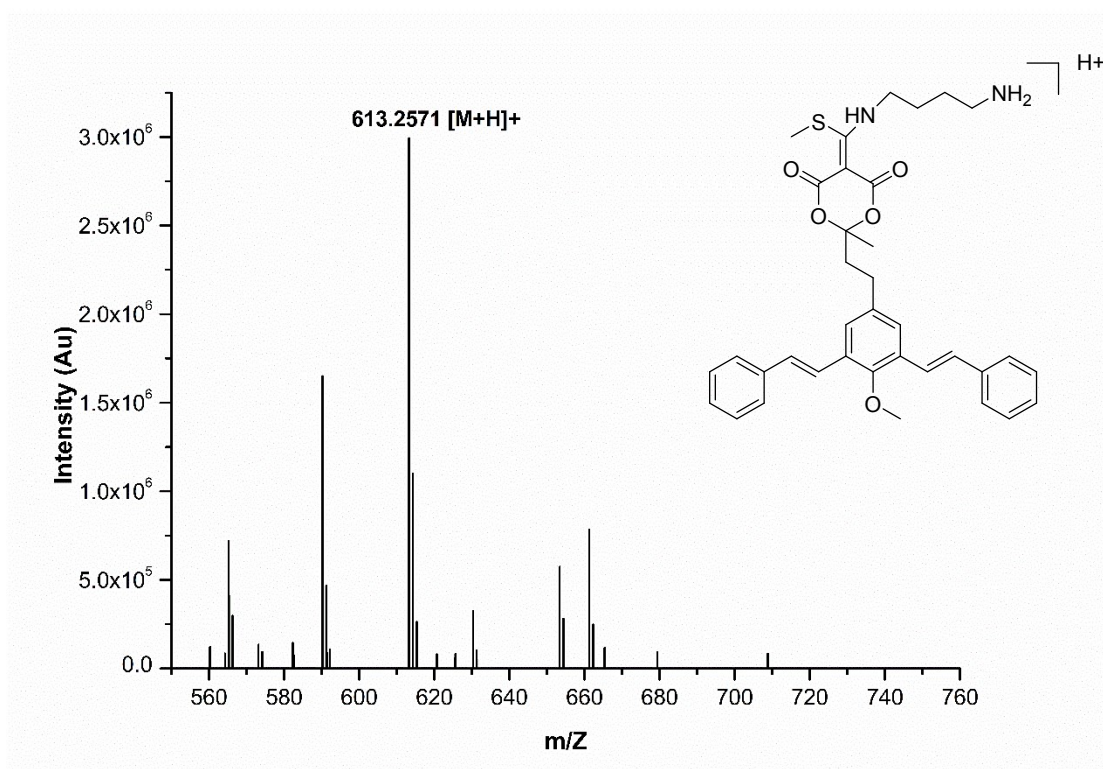

**Fig. S19 PUT-BSMAD** high resolution mass spectrometry. Calculated:  $m/z$  = 613.2571, found:  $m/z$  = 613.2571,  $[M+H]^+$ .

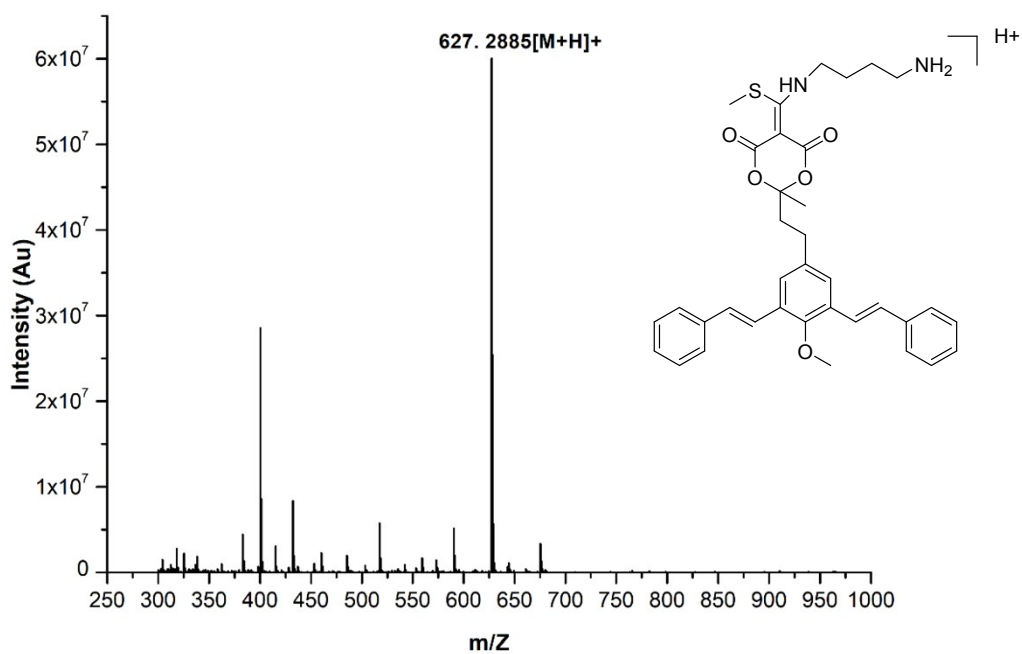

**Fig. S20 CAD-BSMAD** high resolution mass spectrometry. Calculated:  $m/z$  = 627.2887, found:  $m/z$  = 627.2885,  $[M+H]^+$ .

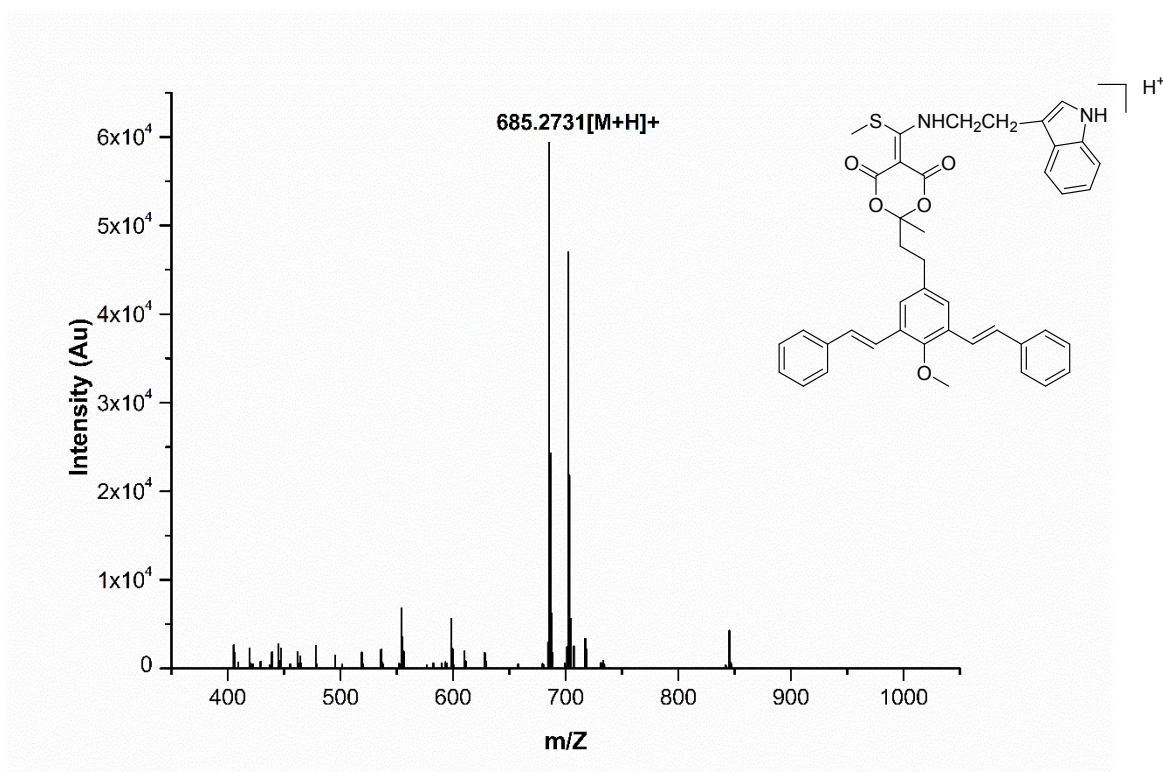

**Fig. S21 TRM-BSMAD** high resolution mass spectrometry. Calculated:  $m/z = 685.2731$ , found:  $m/z = 685.2731$ ,  $[M+H]^+$ .

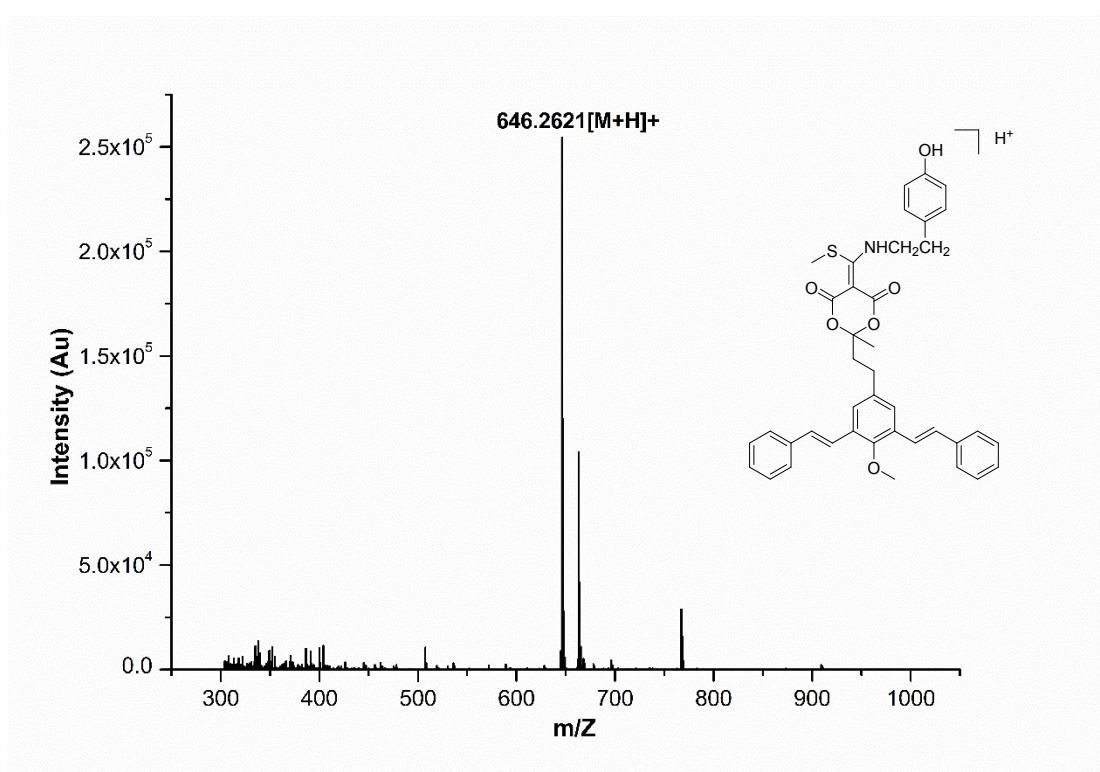

**Fig. S22 PEA-BSMAD** high resolution mass spectrometry. Calculated:  $m/z = 646.2622$ , found:  $m/z = 646.2621$ ,  $[M+H]^+$ .



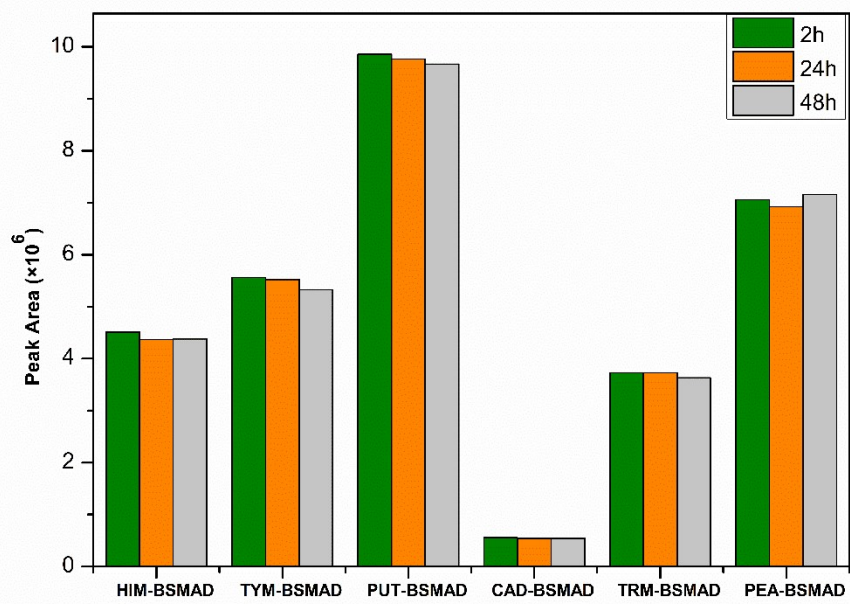

**Fig. S23** Stability of amine derivatives
